# Supplementary material for: The degradation of ciprofloxacin in the UV/NH2Cl process: kinetics, mechanism, pathways and DBP formation
Source: Royal Society of Chemistry journal article supplement (doi:10.1039/d3ew00166k), 2023-01-01
Supplement: d3ew00166k1.pdf [file d3ew00166k1.pdf]

## Supplementary material

For

### **Degradation of ciprofloxacin in UV/NH<sub>2</sub>Cl process: kinetics, mechanism, pathways and DBPs formation**

Ruihua Zhang<sup>a1</sup>, Cheng Peng<sup>a1</sup>, Qiongfang Wang<sup>a\*</sup>, Xinyu Zou<sup>a</sup>, Qiming Zhao<sup>a</sup>, Jiajun Wang<sup>a</sup>,

Jiayu Zhang<sup>a</sup>, Lei Dong<sup>b, c</sup>, Xin Zhang<sup>c</sup>, Naiyun Gao<sup>b</sup>

<sup>a</sup> College of Chemistry and Chemical Engineering, Shanghai University of Engineering Science,  
Shanghai 201600, China

<sup>b</sup> State Key Laboratory of Pollution Control Reuse, Tongji University, Shanghai 200092, China

<sup>c</sup> Shanghai Municipal Engineering Design Institute (Group) Co., LTD, Shanghai 200092, China

<sup>1</sup> Co-first authors

## Tables

Table S1. Trihalomethanes and haloacetonitriles analysis – gas chromatograph operating conditions

| Parameter            | Description                                                                                                                          |
|----------------------|--------------------------------------------------------------------------------------------------------------------------------------|
| Injector Temperature | Splitless 200°C<br>15 sec purge activation time                                                                                      |
| Detector Temperature | 300°C                                                                                                                                |
| Temperature Program  | 35°C for 9.0 min<br>10°C/min temperature ramp to 40°C<br>40°C for 3.0 min<br>15°C/min temperature ramp to 150°C<br>150°C for 1.0 min |
| Carrier Gas          | Helium                                                                                                                               |
| Flow Rate            | 24.8 cm/sec at 150°C                                                                                                                 |

Table S2. Haloacetic acids analysis – gas chromatograph operating conditions

| Parameter            | Description                                                                                                                                                                                 |
|----------------------|---------------------------------------------------------------------------------------------------------------------------------------------------------------------------------------------|
| Injector Temperature | Splitless 210°C<br>15 sec purge activation time                                                                                                                                             |
| Detector Temperature | 300°C                                                                                                                                                                                       |
| Temperature Program  | 40°C for 2.0 min<br>1°C/min temperature ramp to 65°C<br>65°C for 2.0 min<br>10°C/min temperature ramp to 90°C<br>150°C for 0 min<br>30°C/min temperature ramp to 210°C<br>210°C for 2.0 min |
| Carrier Gas          | Helium                                                                                                                                                                                      |
| Flow Rate            | 24.8 cm/sec at 150°C                                                                                                                                                                        |

Table S3. Comparison of degradation efficiency between different systems

| Degradation system               | Target pollution | Initial concentration | UV lamp power          | Oxidant concentration | Degradation time | Reference              |
|----------------------------------|------------------|-----------------------|------------------------|-----------------------|------------------|------------------------|
| UV/Cl <sub>2</sub>               | Metoprolol       | 0.1 mg/L              | 1.1 mW/cm <sup>2</sup> | 1.0 mM                | 120 min          | (Nam et al. 2015)      |
| UV/H <sub>2</sub> O <sub>2</sub> | Cefixime         | 9 mg/L                | 36 W                   | 0.85 mM               | 180 min          | (Belghadr et al. 2014) |
| UV/PS                            | Thiamphenicol    | 0.14 mg/L             | 20 W                   | 1.0 mM                | 60 min           | (Wang et al. 2017)     |
| UV/NH <sub>2</sub> Cl            | Ciprofloxacin    | 5 mg/L                | 65 uW/cm <sup>2</sup>  | 0.5 mM                | 90 min           | /                      |

## Reference

- [1] Belghadr, Issa, Ghodrattollah Shams Khorramabadi, Hatam Godini, and Mohammad Almasian. 2014. 'The removal of the cefixime antibiotic from aqueous solution using an advanced oxidation process (UV/H<sub>2</sub>O<sub>2</sub>)', *Desalination and Water Treatment*, 55: 1068-75.
- [2] Nam, S. W., Y. Yoon, D. J. Choi, and K. D. Zoh. 2015. 'Degradation characteristics of metoprolol during UV/chlorination reaction and a factorial design optimization', *J Hazard Mater*, 285: 453-63.
- [3] Wang, Feige, Wenjing Wang, Shoujun Yuan, Wei Wang, and Zhen-Hu Hu. 2017. 'Comparison of UV/H<sub>2</sub>O<sub>2</sub> and UV/PS processes for the degradation of thiamphenicol in aqueous solution', *Journal of Photochemistry and Photobiology A: Chemistry*, 348: 79-88.

Table S4. pH change of UV/NH<sub>2</sub>Cl system in pH experiments

|                                            | pH   |      |      |      |      |
|--------------------------------------------|------|------|------|------|------|
| Before reaction                            | 3.0  | 5.0  | 7.0  | 9.0  | 11.0 |
| After reaction<br>(Parallel experiment I)  | 3.12 | 5.89 | 6.26 | 6.85 | 8.76 |
| After reaction<br>(Parallel experiment II) | 3.25 | 5.74 | 6.13 | 7.23 | 9.12 |

Table S5. Degradation products of CIP during the UV/NH<sub>2</sub>Cl process

| Compound | Retention Time(min) | m/z    | Formula                                                        | Possible chemical structure |
|----------|---------------------|--------|----------------------------------------------------------------|-----------------------------|
| CIP      | 3.59                | 311.13 | C <sub>17</sub> H <sub>18</sub> FN <sub>3</sub> O <sub>3</sub> |                             |
| A        | 3.18                | 305.12 | C <sub>15</sub> H <sub>16</sub> FN <sub>3</sub> O <sub>3</sub> |                             |
| B        | 6.98                | 262.08 | C <sub>13</sub> H <sub>11</sub> FN <sub>2</sub> O <sub>3</sub> |                             |
| C        | 1.61                | 248.10 | C <sub>13</sub> H <sub>13</sub> FN <sub>2</sub> O <sub>2</sub> |                             |
| D        | 1.61                | 204.11 | C <sub>12</sub> H <sub>13</sub> FN <sub>2</sub>                |                             |

|   |      |        |                       |                                                                                      |
|---|------|--------|-----------------------|--------------------------------------------------------------------------------------|
| E | 3.48 | 146.08 | $C_9H_{12}N_2$        | 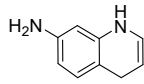  |
| F | 5.57 | 361.11 | $C_{17}H_{16}FN_3O_5$ |   |
| G | 3.79 | 244.06 | $C_{13}H_9FN_2O_2$    |   |
| H | 5.45 | 291.10 | $C_{14}H_{14}FN_3O_3$ |   |
| I | 6.98 | 265.09 | $C_{12}H_{12}FN_3O_3$ |   |
| J | 5.98 | 222.04 | $C_{10}H_7FN_2O_3$    |   |
| K | 4.42 | 208.06 | $C_{10}H_9FN_2O_2$    |  |

## Figures

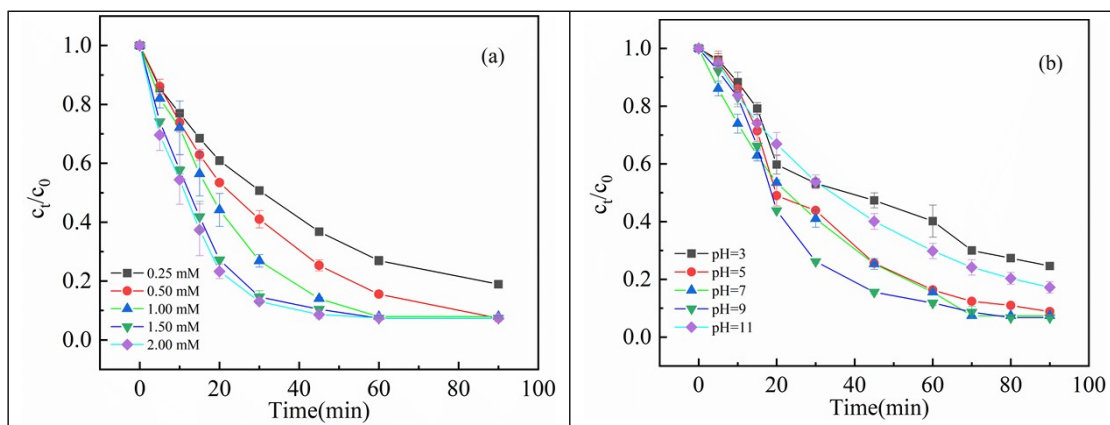

Fig. S2 Effect of (a) initial  $\text{NH}_2\text{Cl}$  concentration, (b) initial pH, of different concentrations on the degradation of CIP by UV/ $\text{NH}_2\text{Cl}$ . Conditions:  $[\text{CIP}] = 19.58 \mu\text{M} = 5\text{mg/L}$ ,  $[\text{NH}_2\text{Cl}] = 0.25 \sim 2 \text{ mM}$ ,  $\text{pH} = 5.0 \sim 10.0$ ,  $[\text{NOM}] = 0 \sim 4 \text{ mg/L}$ ,  $[\text{HCO}_3^-] = 0 \sim 4 \text{ mM}$ ,  $[\text{CO}_3^{2-}] = 0 \sim 4 \text{ mM}$ ,  $[\text{Cl}^-] = 0 \sim 4 \text{ mM}$ ,  $[\text{NO}_3^-] = 0 \sim 4 \text{ mM}$ ,  $[\text{TBA}] = 0 \sim 50 \text{ mM}$ ,  $I_s = 65 \mu\text{W}/\text{cm}^2$ .

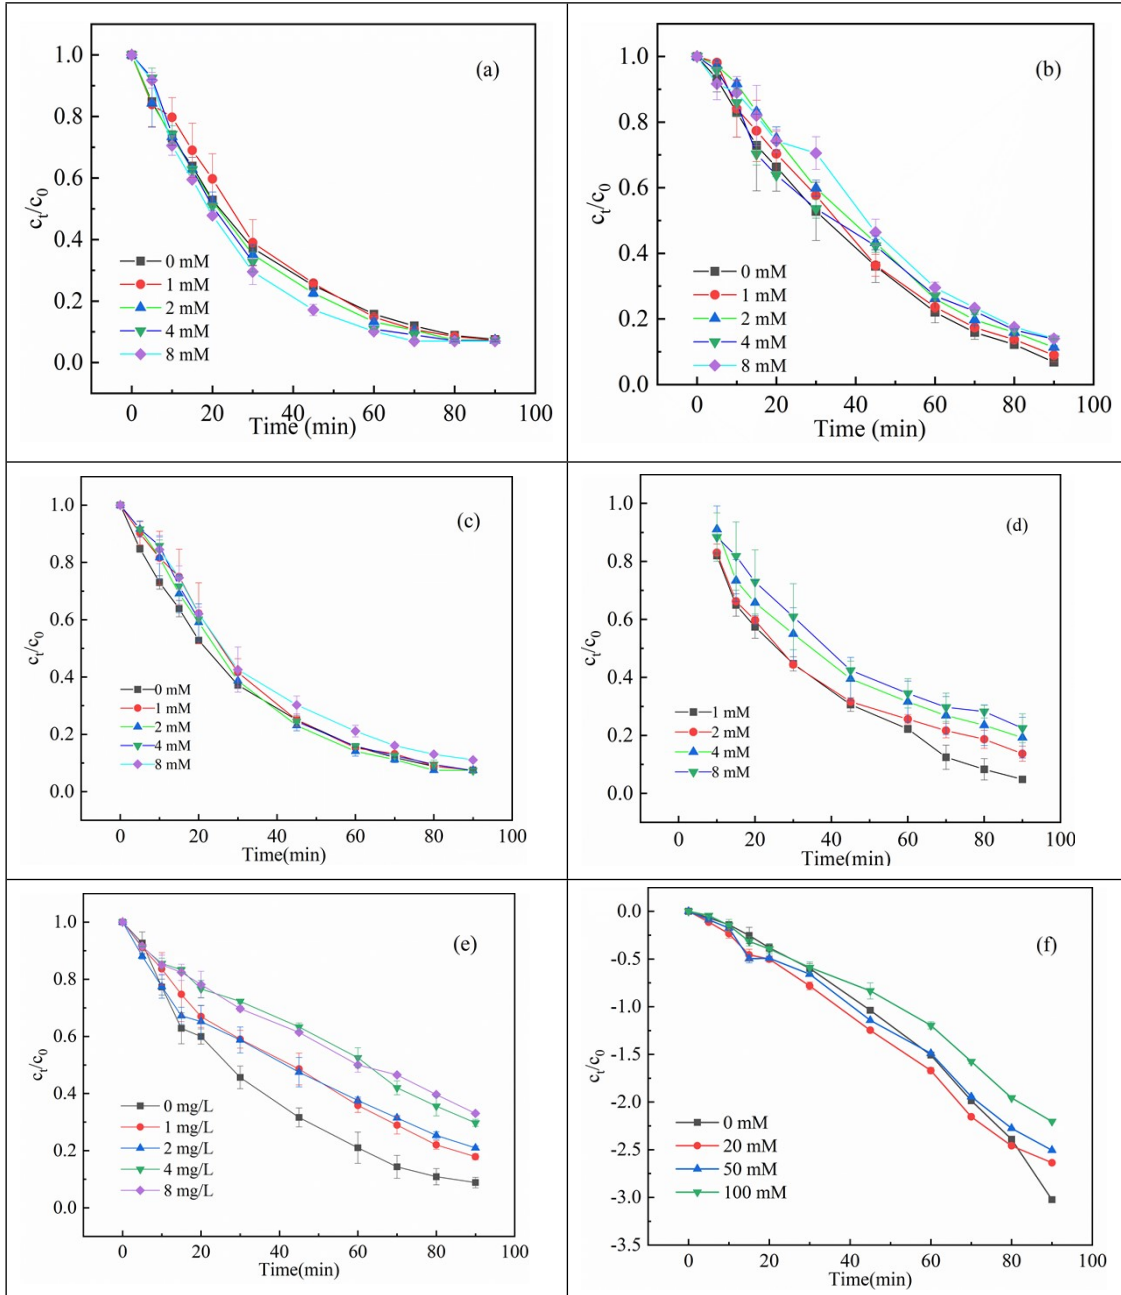

Fig. S3 Effect of (a)  $\text{Cl}^-$ , (b)  $\text{NO}_3^-$ , (c)  $\text{HCO}_3^-$ , (d)  $\text{CO}_3^{2-}$ , (e) NOM, (f) TBA of different concentrations on the degradation of CIP by UV/ $\text{NH}_2\text{Cl}$ . Conditions:  $[\text{CIP}] = 19.58 \mu\text{M} = 5\text{mg/L}$ ,  $[\text{NH}_2\text{Cl}] = 0.25 \sim 2 \text{ mM}$ ,  $\text{pH} = 5.0 \sim 10.0$ ,  $[\text{NOM}] = 0 \sim 4 \text{ mg/L}$ ,  $[\text{HCO}_3^-] = 0 \sim 4 \text{ mM}$ ,  $[\text{CO}_3^{2-}] = 0 \sim 4 \text{ mM}$ ,  $[\text{Cl}^-] = 0 \sim 4 \text{ mM}$ ,  $[\text{NO}_3^-] = 0 \sim 4 \text{ mM}$ ,  $[\text{TBA}] = 0 \sim 50 \text{ mM}$ ,  $I_s = 65 \mu\text{W}/\text{cm}^2$ .

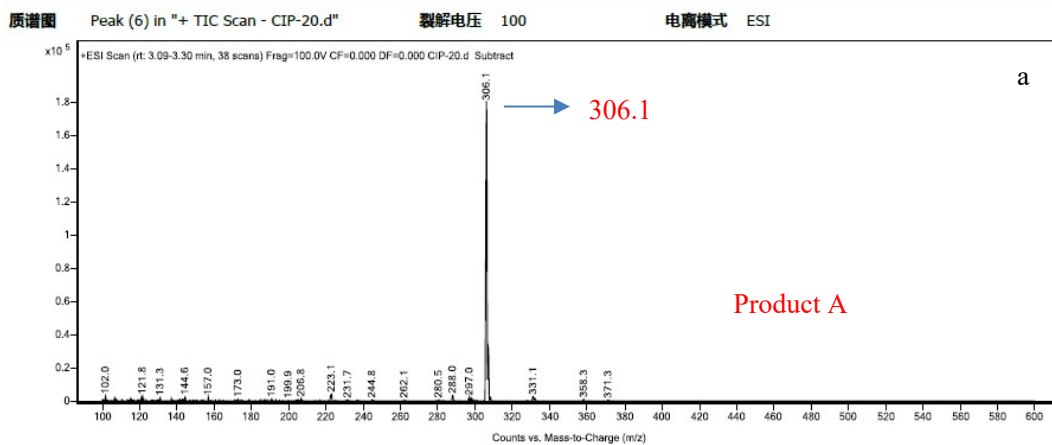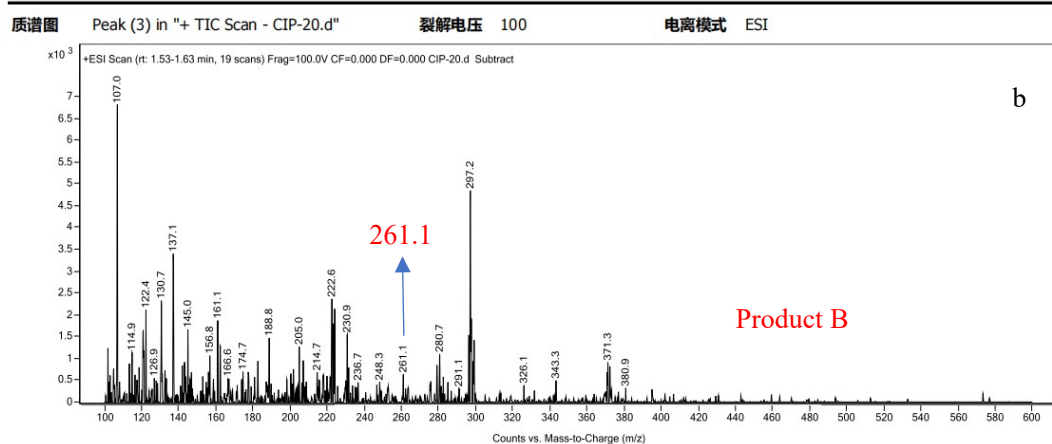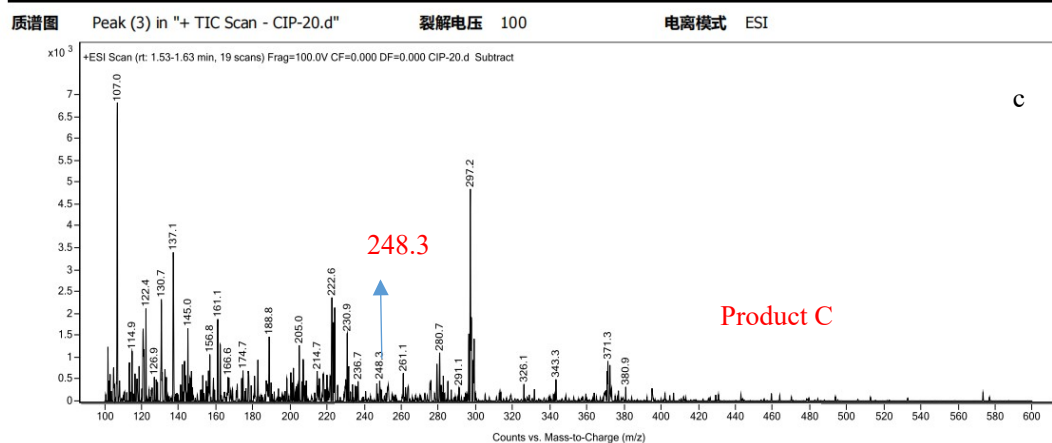

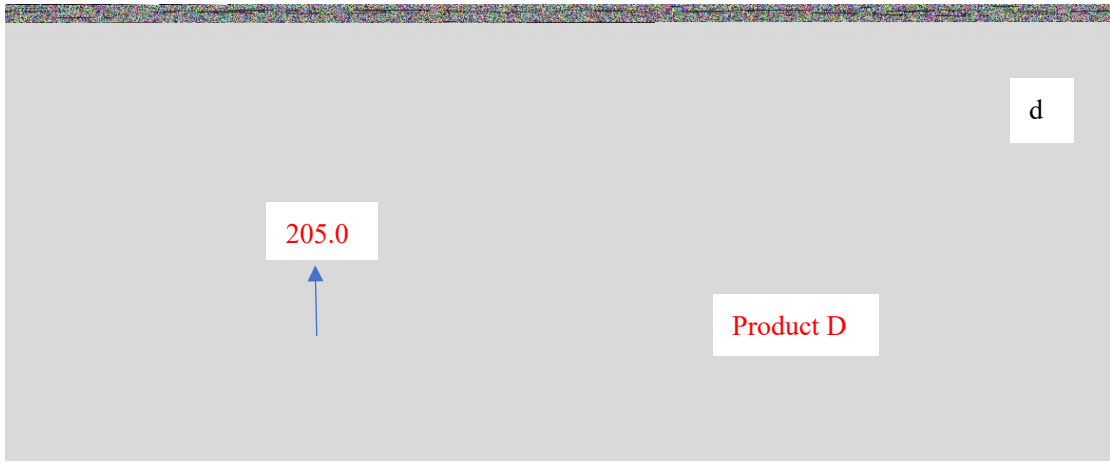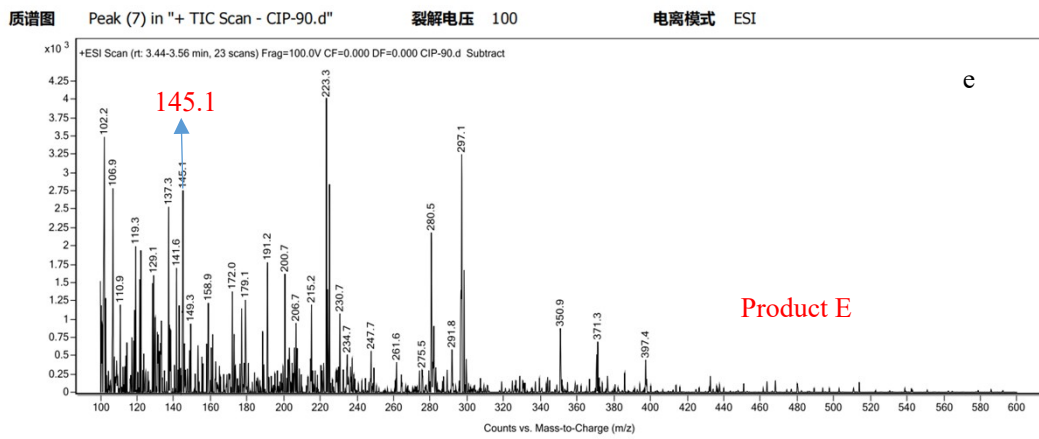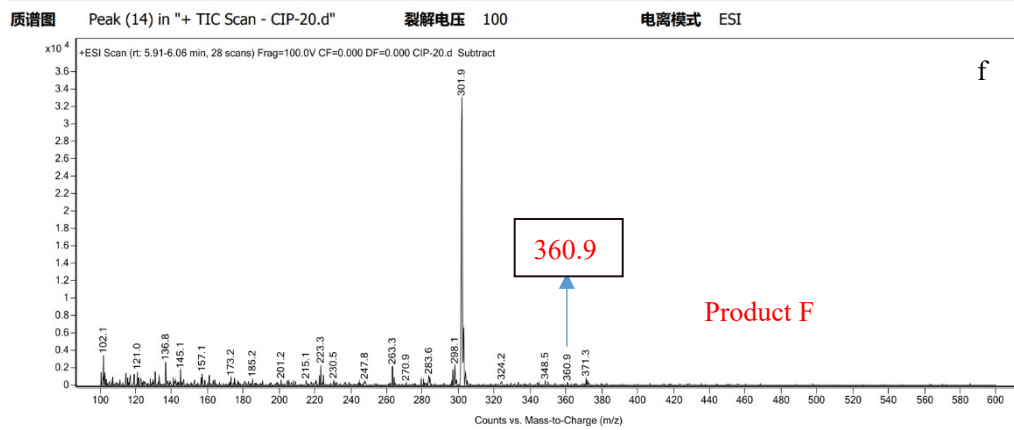

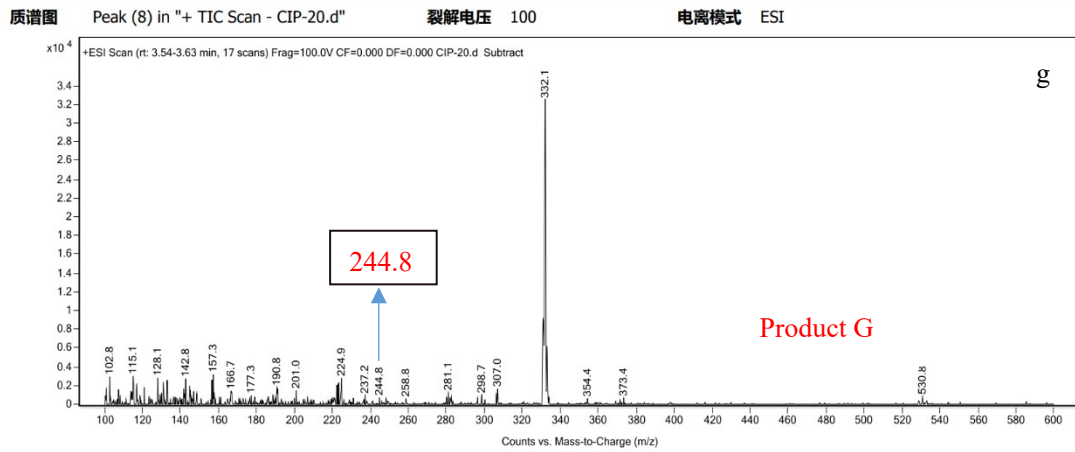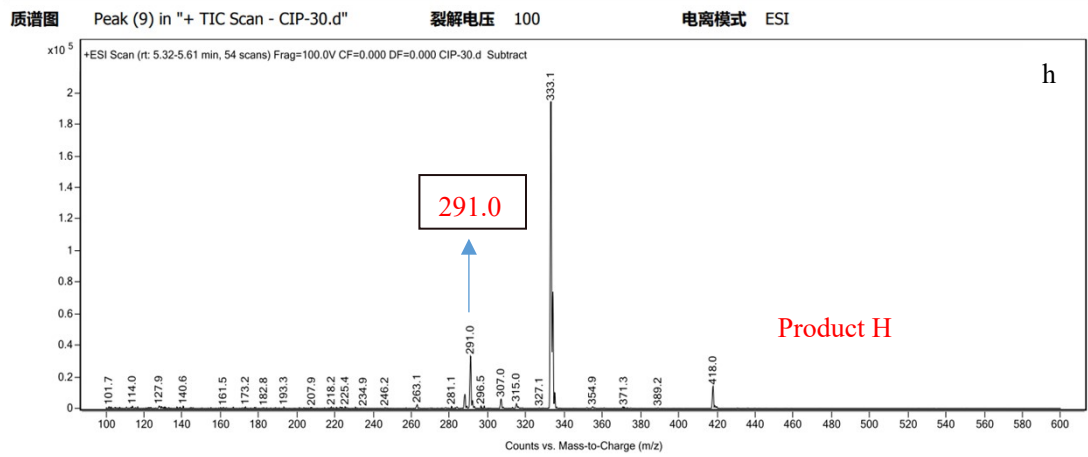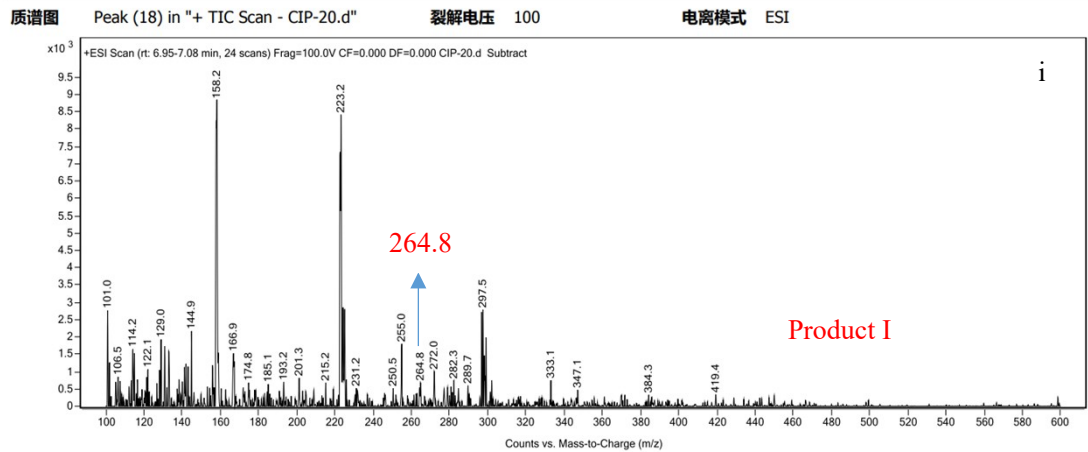



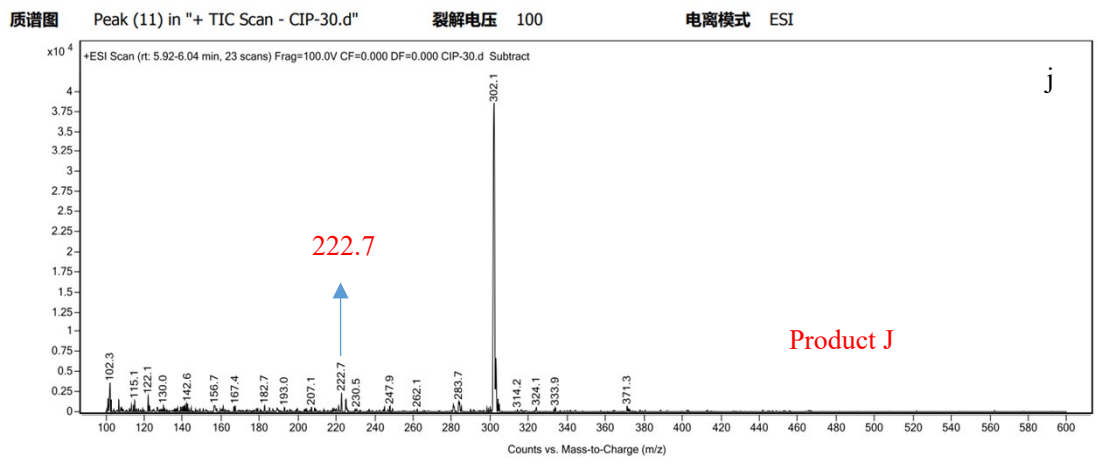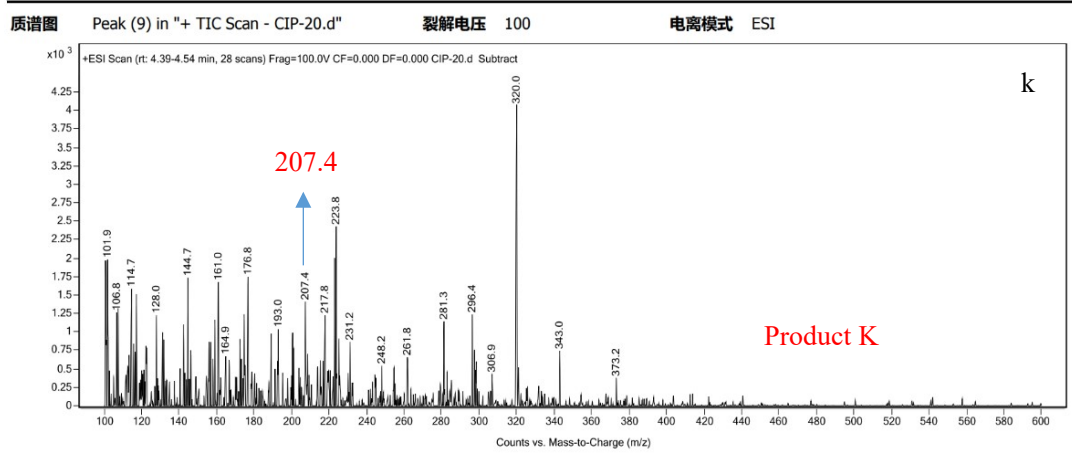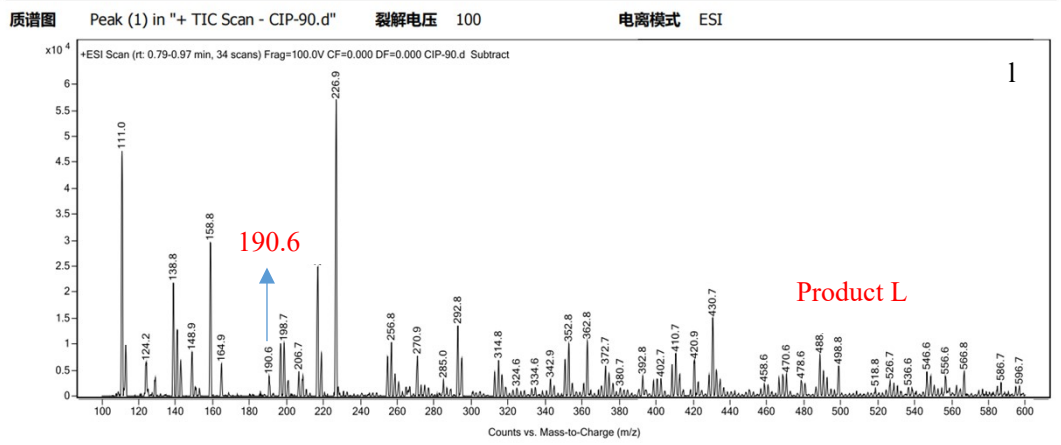

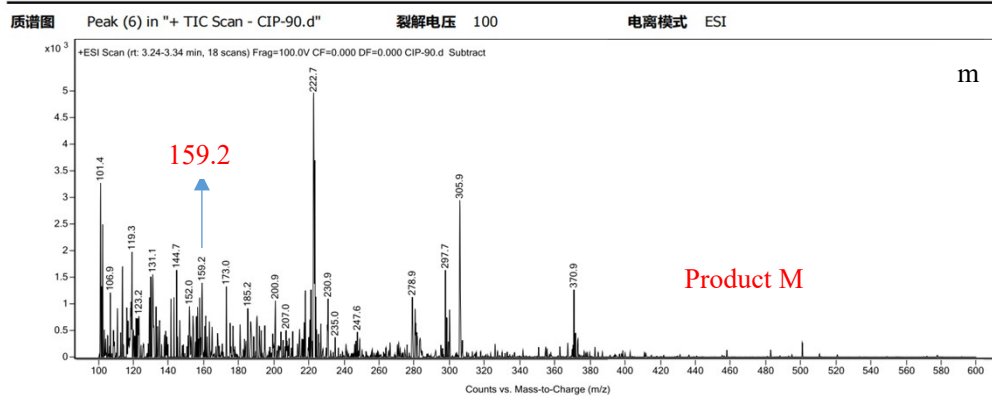

Fig. S3. The mass spectrograms of intermediate products of A to M (a-m).
